# Supplementary material
Source: PubMed Central journal article supplement (PMC2268781)

**A**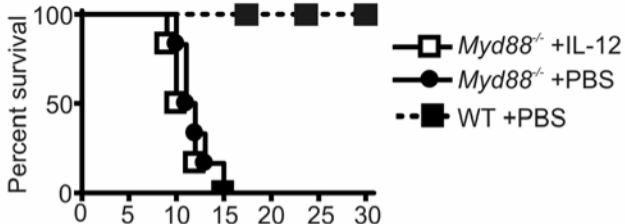**B**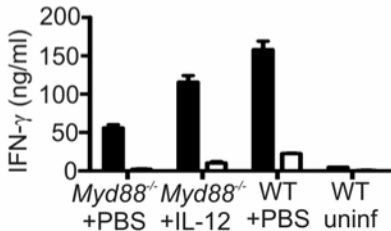**C**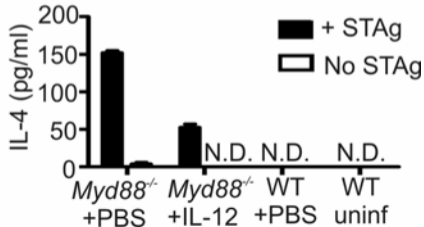

Supplement: pnas_0706663105_1.pdf [file pnas_0706663105_1.pdf]

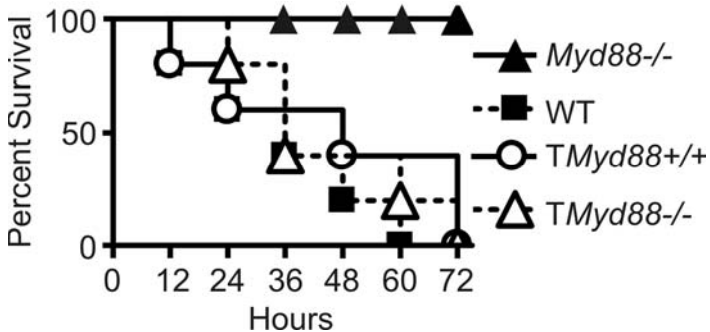

Supplement: pnas_0706663105_2.pdf [file pnas_0706663105_2.pdf]

Percent survival

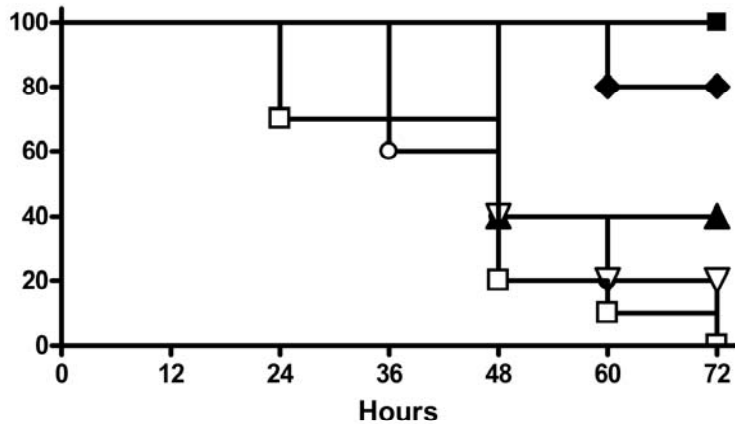

■ IL1r1-/- n=5

◆ WT+IL-1RA 15 mg n=10

▲ WT+IL1RA 12 mg n=5

○ WT+IL1RA 6 mg n=5

▽ WT+IL1RA 1.5 mg n=5

□ WT n=10

Supplement: pnas_0706663105_3.pdf [file pnas_0706663105_3.pdf]
